# Supplementary material for: Steric hindrance, ligand ejection and associated photocytotoxic properties of ruthenium(II) polypyridyl complexes
Source: PubMed Central journal article supplement (PMC10149480; doi:10.1007/s00775-023-01998-z), 2023-04-15

## checkCIF/PLATON report

Structure factors have been supplied for datablock(s) 2036sb15\_0m

THIS REPORT IS FOR GUIDANCE ONLY. IF USED AS PART OF A REVIEW PROCEDURE FOR PUBLICATION, IT SHOULD NOT REPLACE THE EXPERTISE OF AN EXPERIENCED CRYSTALLOGRAPHIC REFEREE.

No syntax errors found.      CIF dictionary      Interpreting this report

### Datablock: 2036sb15\_0m

---

Bond precision:    C-C = 0.0075 A                      Wavelength=0.71073

Cell:                      a=19.5843(8)              b=9.4572(4)              c=23.4404(10)  
                            alpha=90                      beta=96.134(2)              gamma=90

Temperature:              296 K

|                        | Calculated                         | Reported             |
|------------------------|------------------------------------|----------------------|
| Volume                 | 4316.6(3)                          | 4316.6(3)            |
| Space group            | P 21/c                             | P 21/c               |
| Hall group             | -P 2ybc                            | -P 2ybc              |
| Moiety formula         | C41 H31 N7 Ru, 2(F6 P), C2<br>H3 N | ?                    |
| Sum formula            | C43 H34 F12 N8 P2 Ru               | C43 H34 F12 N8 P2 Ru |
| Mr                     | 1053.79                            | 1053.79              |
| Dx, g cm <sup>-3</sup> | 1.622                              | 1.622                |
| Z                      | 4                                  | 4                    |
| Mu (mm <sup>-1</sup> ) | 0.533                              | 0.533                |
| F000                   | 2120.0                             | 2120.0               |
| F000'                  | 2117.00                            |                      |
| h, k, lmax             | 26, 12, 31                         | 26, 12, 31           |
| Nref                   | 11160                              | 11077                |
| Tmin, Tmax             | 0.852, 0.899                       | 0.658, 0.746         |
| Tmin'                  | 0.808                              |                      |

Correction method= # Reported T Limits: Tmin=0.658 Tmax=0.746  
AbsCorr = MULTI-SCAN

Data completeness= 0.993                      Theta(max)= 28.700

R(reflections)= 0.0653( 8339)

wR2(reflections)=  
0.2050( 11077)

S = 1.050

Npar= 572

---

The following ALERTS were generated. Each ALERT has the format

**test-name\_ALERT\_alert-type\_alert-level.**

Click on the hyperlinks for more details of the test.

---

● **Alert level C**

|                   |               |                                            |       |        |
|-------------------|---------------|--------------------------------------------|-------|--------|
| PLAT244_ALERT_4_C | Low           | 'Solvent' Ueq as Compared to Neighbors of  | C43   | Check  |
| PLAT250_ALERT_2_C | Large         | U3/U1 Ratio for Average U(i,j) Tensor .... | 2.3   | Note   |
| PLAT260_ALERT_2_C | Large         | Average Ueq of Residue Including P1        | 0.117 | Check  |
| PLAT260_ALERT_2_C | Large         | Average Ueq of Residue Including P2        | 0.155 | Check  |
| PLAT601_ALERT_2_C | Unit Cell     | Contains Solvent Accessible VOIDS of .     | 32    | Ang**3 |
| PLAT906_ALERT_3_C | Large         | K Value in the Analysis of Variance .....  | 2.895 | Check  |
| PLAT911_ALERT_3_C | Missing       | FCF Refl Between Thmin & STh/L= 0.600      | 44    | Report |
| PLAT918_ALERT_3_C | Reflection(s) | with I(obs) much Smaller I(calc) .         | 1     | Check  |
| PLAT971_ALERT_2_C | Check         | Calcd Resid. Dens. 1.23Ang From F8         | 1.76  | eA-3   |
| PLAT971_ALERT_2_C | Check         | Calcd Resid. Dens. 0.29Ang From F11        | 1.73  | eA-3   |
| PLAT971_ALERT_2_C | Check         | Calcd Resid. Dens. 1.07Ang From F7         | 1.72  | eA-3   |

---

● **Alert level G**

|                   |                  |                                           |      |             |
|-------------------|------------------|-------------------------------------------|------|-------------|
| PLAT002_ALERT_2_G | Number of        | Distance or Angle Restraints on AtSite    | 4    | Note        |
| PLAT083_ALERT_2_G | SHELXL           | Second Parameter in WGHT Unusually Large  | 6.89 | Why ?       |
| PLAT171_ALERT_4_G | The CIF-Embedded | .res File Contains EADP Records           | 1    | Report      |
| PLAT173_ALERT_4_G | The CIF-Embedded | .res File Contains DANG Records           | 3    | Report      |
| PLAT231_ALERT_4_G | Hirshfeld        | Test (Solvent) P2 --F7 .                  | 46.0 | s.u.        |
| PLAT231_ALERT_4_G | Hirshfeld        | Test (Solvent) P2 --F8 .                  | 50.7 | s.u.        |
| PLAT231_ALERT_4_G | Hirshfeld        | Test (Solvent) P2 --F9 .                  | 47.0 | s.u.        |
| PLAT231_ALERT_4_G | Hirshfeld        | Test (Solvent) P2 --F10 .                 | 50.3 | s.u.        |
| PLAT231_ALERT_4_G | Hirshfeld        | Test (Solvent) P2 --F11 .                 | 19.7 | s.u.        |
| PLAT244_ALERT_4_G | Low              | 'Solvent' Ueq as Compared to Neighbors of | P1   | Check       |
| PLAT244_ALERT_4_G | Low              | 'Solvent' Ueq as Compared to Neighbors of | P2   | Check       |
| PLAT790_ALERT_4_G | Centre of        | Gravity not Within Unit Cell: Resd. #     | 4    | Note        |
|                   | C2 H3 N          |                                           |      |             |
| PLAT794_ALERT_5_G | Tentative        | Bond Valency for Ru1 (III) .              | 2.89 | Info        |
| PLAT860_ALERT_3_G | Number of        | Least-Squares Restraints .....            | 3    | Note        |
| PLAT883_ALERT_1_G | No Info/Value    | for _atom_sites_solution_primary .        |      | Please Do ! |
| PLAT910_ALERT_3_G | Missing #        | of FCF Reflection(s) Below Theta(Min).    | 1    | Note        |
| PLAT912_ALERT_4_G | Missing #        | of FCF Reflections Above STh/L= 0.600     | 38   | Note        |
| PLAT933_ALERT_2_G | Number of        | HKL-OMIT Records in Embedded .res File    | 2    | Note        |
| PLAT941_ALERT_3_G | Average          | HKL Measurement Multiplicity .....        | 4.0  | Low         |
| PLAT978_ALERT_2_G | Number           | C-C Bonds with Positive Residual Density. | 2    | Info        |
| PLAT992_ALERT_5_G | Repd &           | Actual _reflns_number_gt Values Differ by | 6    | Check       |

---

0 **ALERT level A** = Most likely a serious problem - resolve or explain  
0 **ALERT level B** = A potentially serious problem, consider carefully  
11 **ALERT level C** = Check. Ensure it is not caused by an omission or oversight  
21 **ALERT level G** = General information/check it is not something unexpected

1 ALERT type 1 CIF construction/syntax error, inconsistent or missing data  
11 ALERT type 2 Indicator that the structure model may be wrong or deficient  
6 ALERT type 3 Indicator that the structure quality may be low  
12 ALERT type 4 Improvement, methodology, query or suggestion  
2 ALERT type 5 Informative message, check

---

It is advisable to attempt to resolve as many as possible of the alerts in all categories. Often the minor alerts point to easily fixed oversights, errors and omissions in your CIF or refinement strategy, so attention to these fine details can be worthwhile. In order to resolve some of the more serious problems it may be necessary to carry out additional measurements or structure refinements. However, the purpose of your study may justify the reported deviations and the more serious of these should normally be commented upon in the discussion or experimental section of a paper or in the "special\_details" fields of the CIF. checkCIF was carefully designed to identify outliers and unusual parameters, but every test has its limitations and alerts that are not important in a particular case may appear. Conversely, the absence of alerts does not guarantee there are no aspects of the results needing attention. It is up to the individual to critically assess their own results and, if necessary, seek expert advice.

### **Publication of your CIF in IUCr journals**

A basic structural check has been run on your CIF. These basic checks will be run on all CIFs submitted for publication in IUCr journals (*Acta Crystallographica*, *Journal of Applied Crystallography*, *Journal of Synchrotron Radiation*); however, if you intend to submit to *Acta Crystallographica Section C* or *E* or *IUCrData*, you should make sure that full publication checks are run on the final version of your CIF prior to submission.

### **Publication of your CIF in other journals**

Please refer to the *Notes for Authors* of the relevant journal for any special instructions relating to CIF submission.

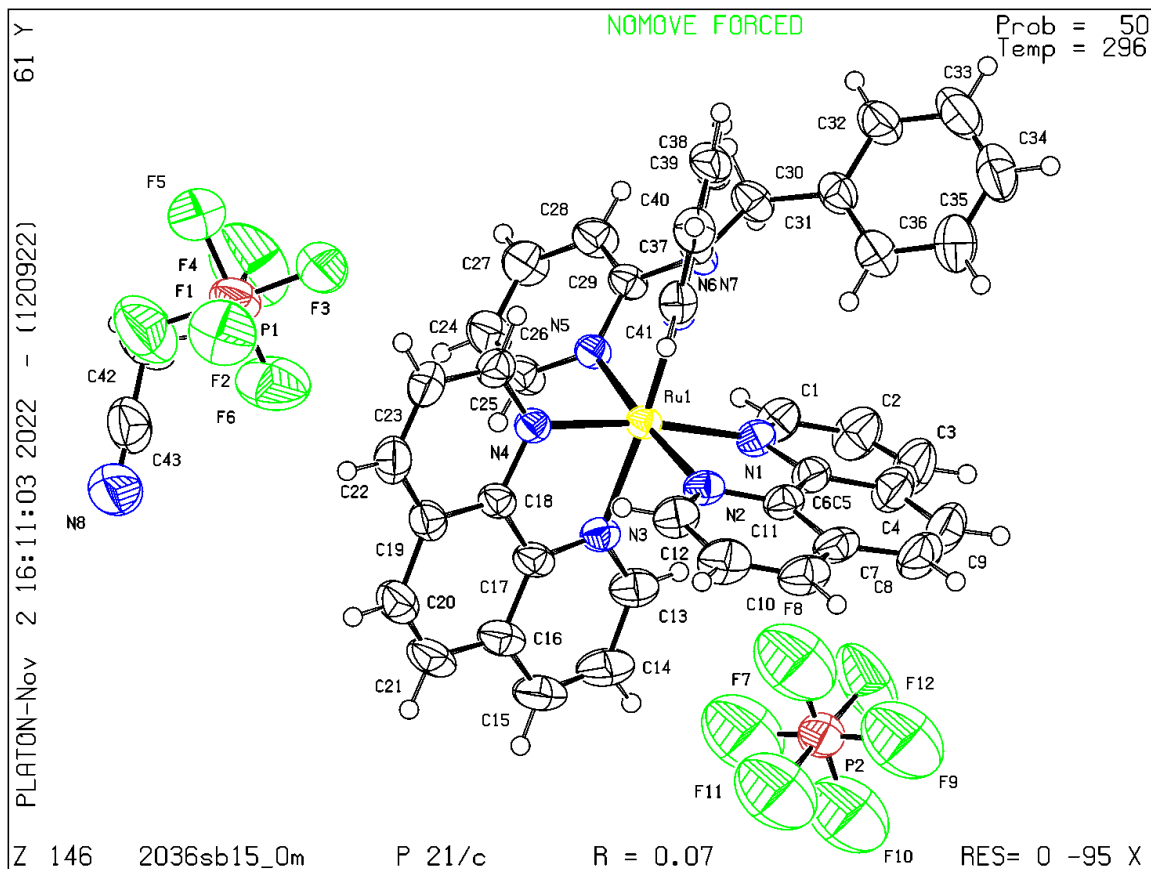

Supplement: 775_2023_1998_MOESM3_ESM.pdf [file 775_2023_1998_MOESM3_ESM.pdf]
